# Supplementary material
Source: PubMed Central journal article supplement (PMC3850197)
Supplement: supp_pp.113.227579_227579SF1.pdf [file supp_pp.113.227579_227579SF1.pdf]

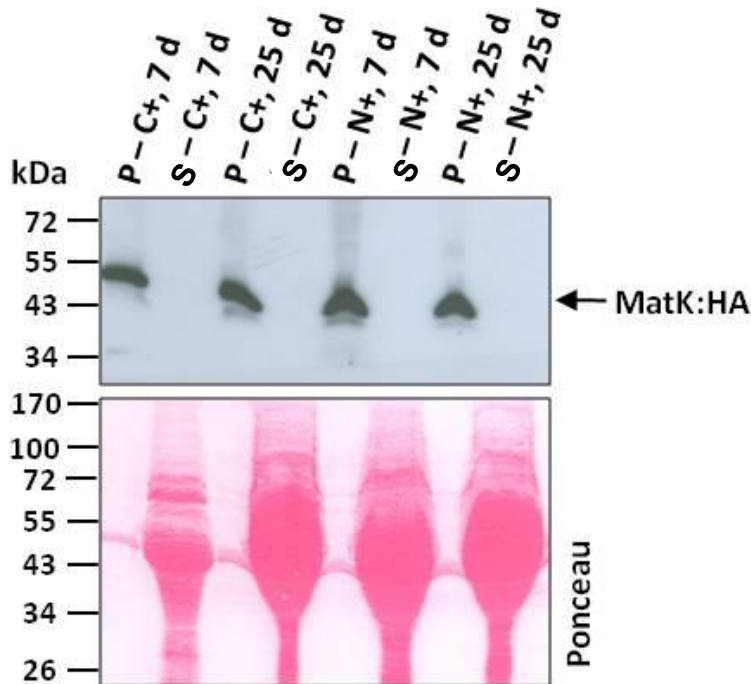

**Supplemental Figure 1:** Immunological analysis of the immunoprecipitation of MatK:HA from stroma fractions of epitope-tagged tobacco plants (C+, N+). About 1/40 of the pellet and supernatant fractions from 7 and 25 day old tagged lines were separated by SDS-PAGE, blotted onto nitrocellulose membranes and hybridized with an HRP-coupled HA-antibody. The MatK:HA-specific signal is found only in the pellet fraction (P) of the immunoprecipitations, not in the supernatant (S), indicating complete pull-down of the tagged MatK protein. A Ponceau-stain of the membrane is shown below. kDa: kilodalton. RNA from these immunoprecipitations were used to generate the dot-blot data shown in Figure 4.
