# Supplementary material
Source: PubMed Central journal article supplement (PMC3850197)
Supplement: supp_pp.113.227579_227579SF2.pdf [file supp_pp.113.227579_227579SF2.pdf]

**A**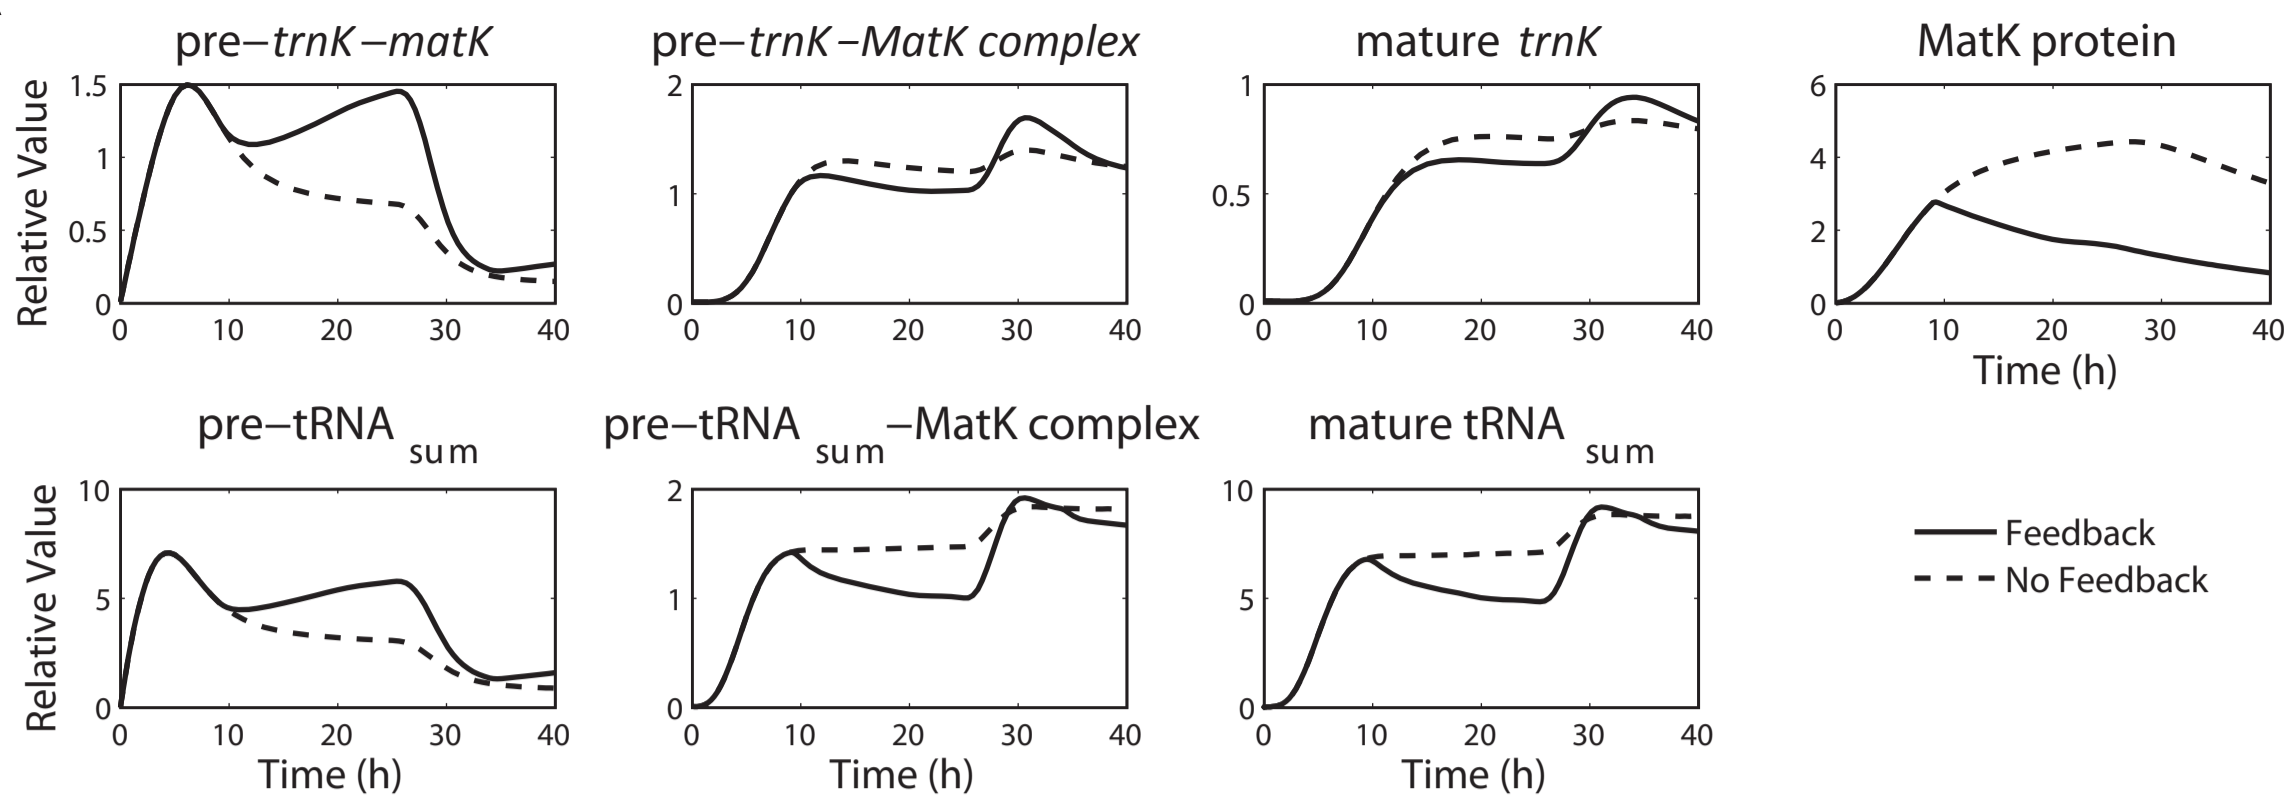**B**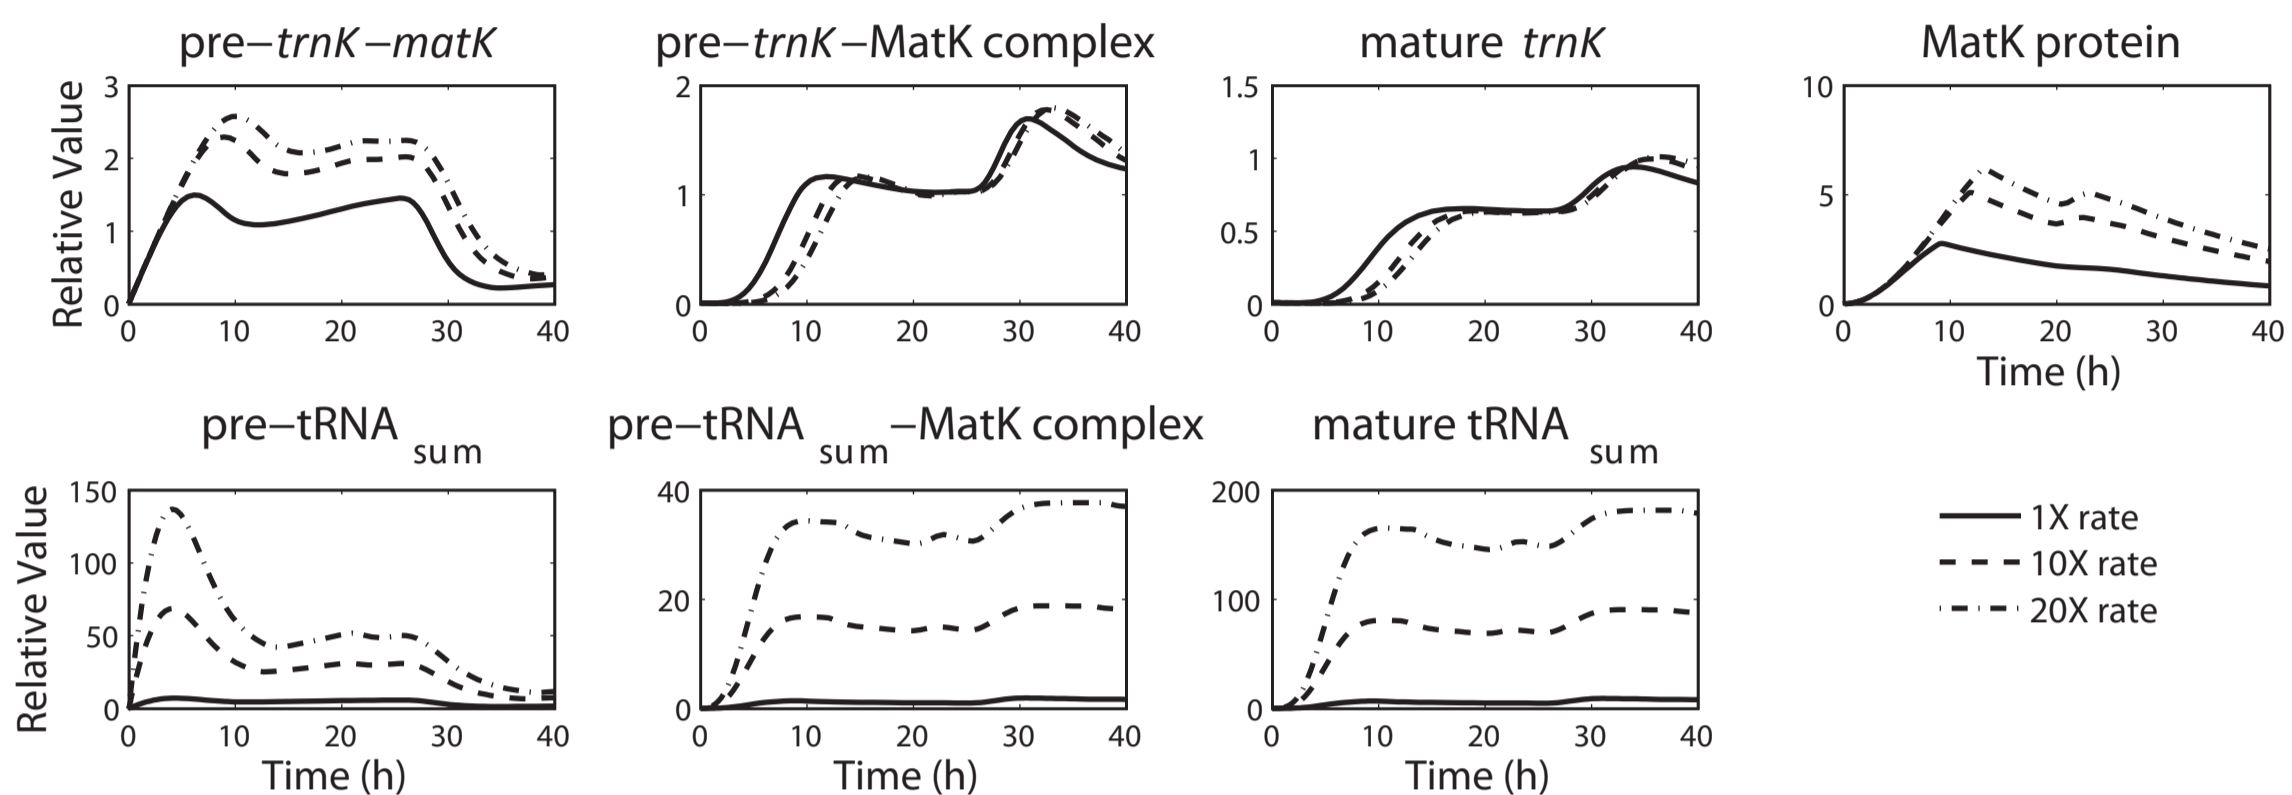**C**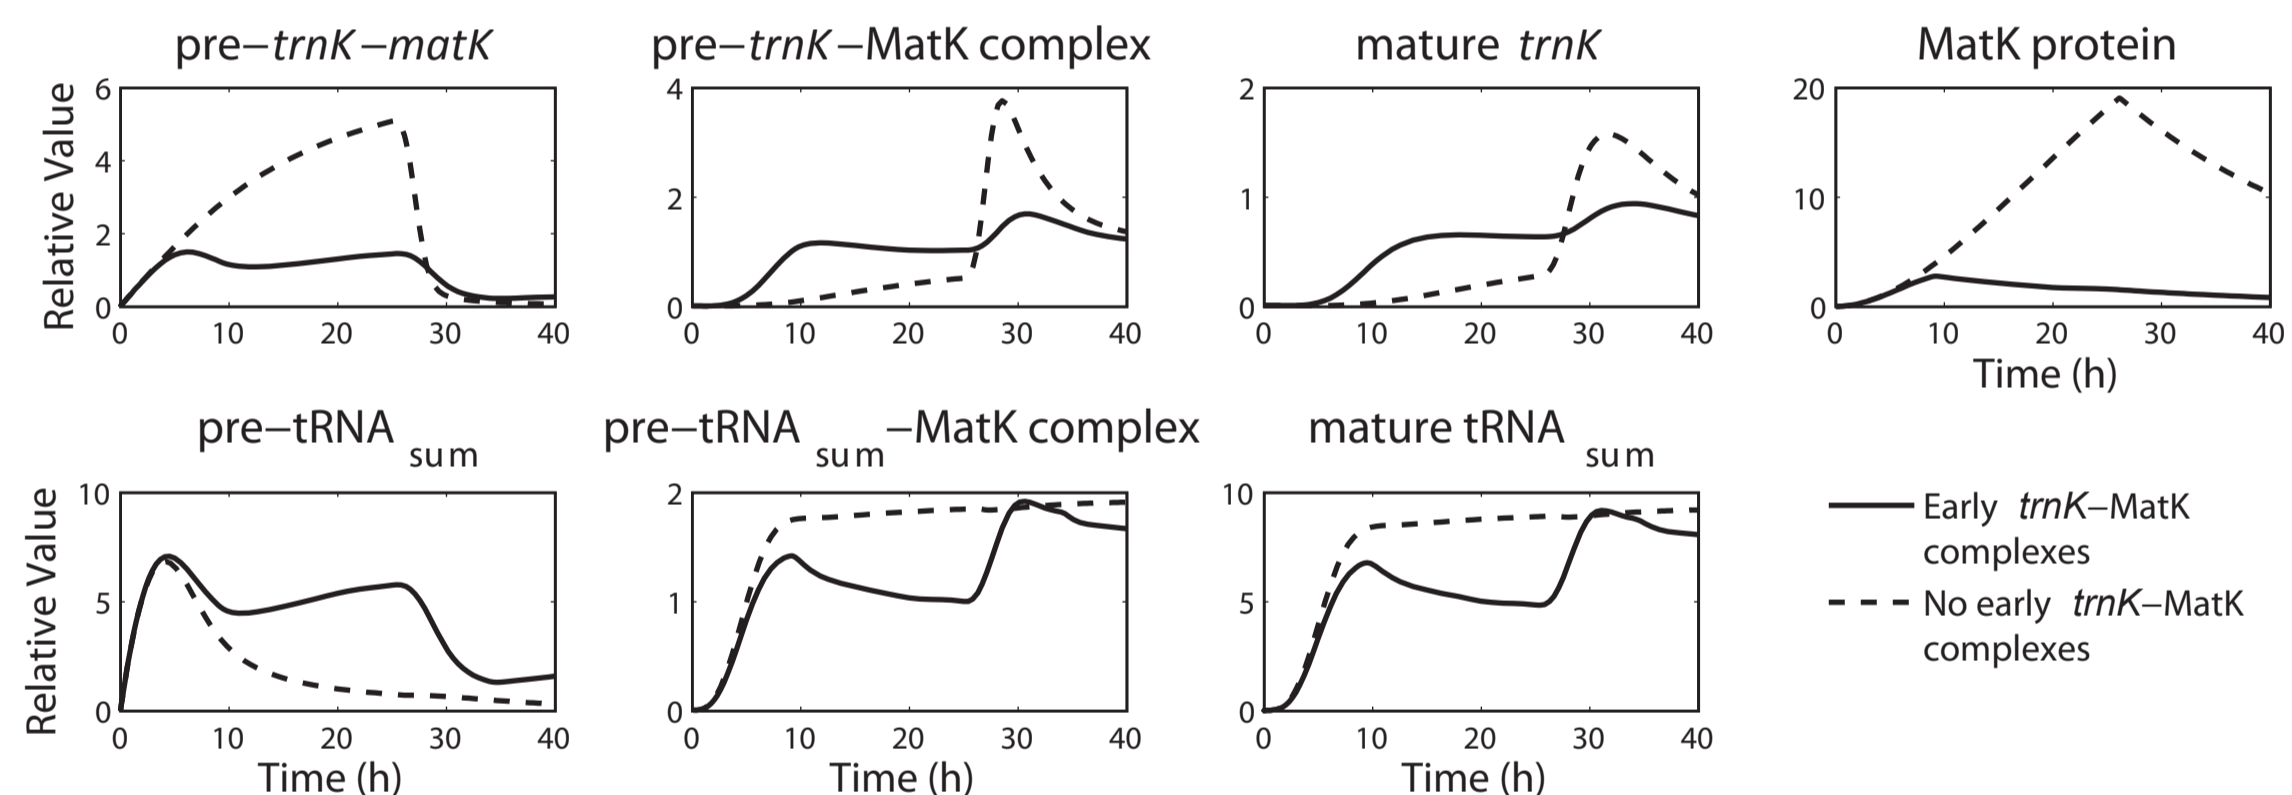**D**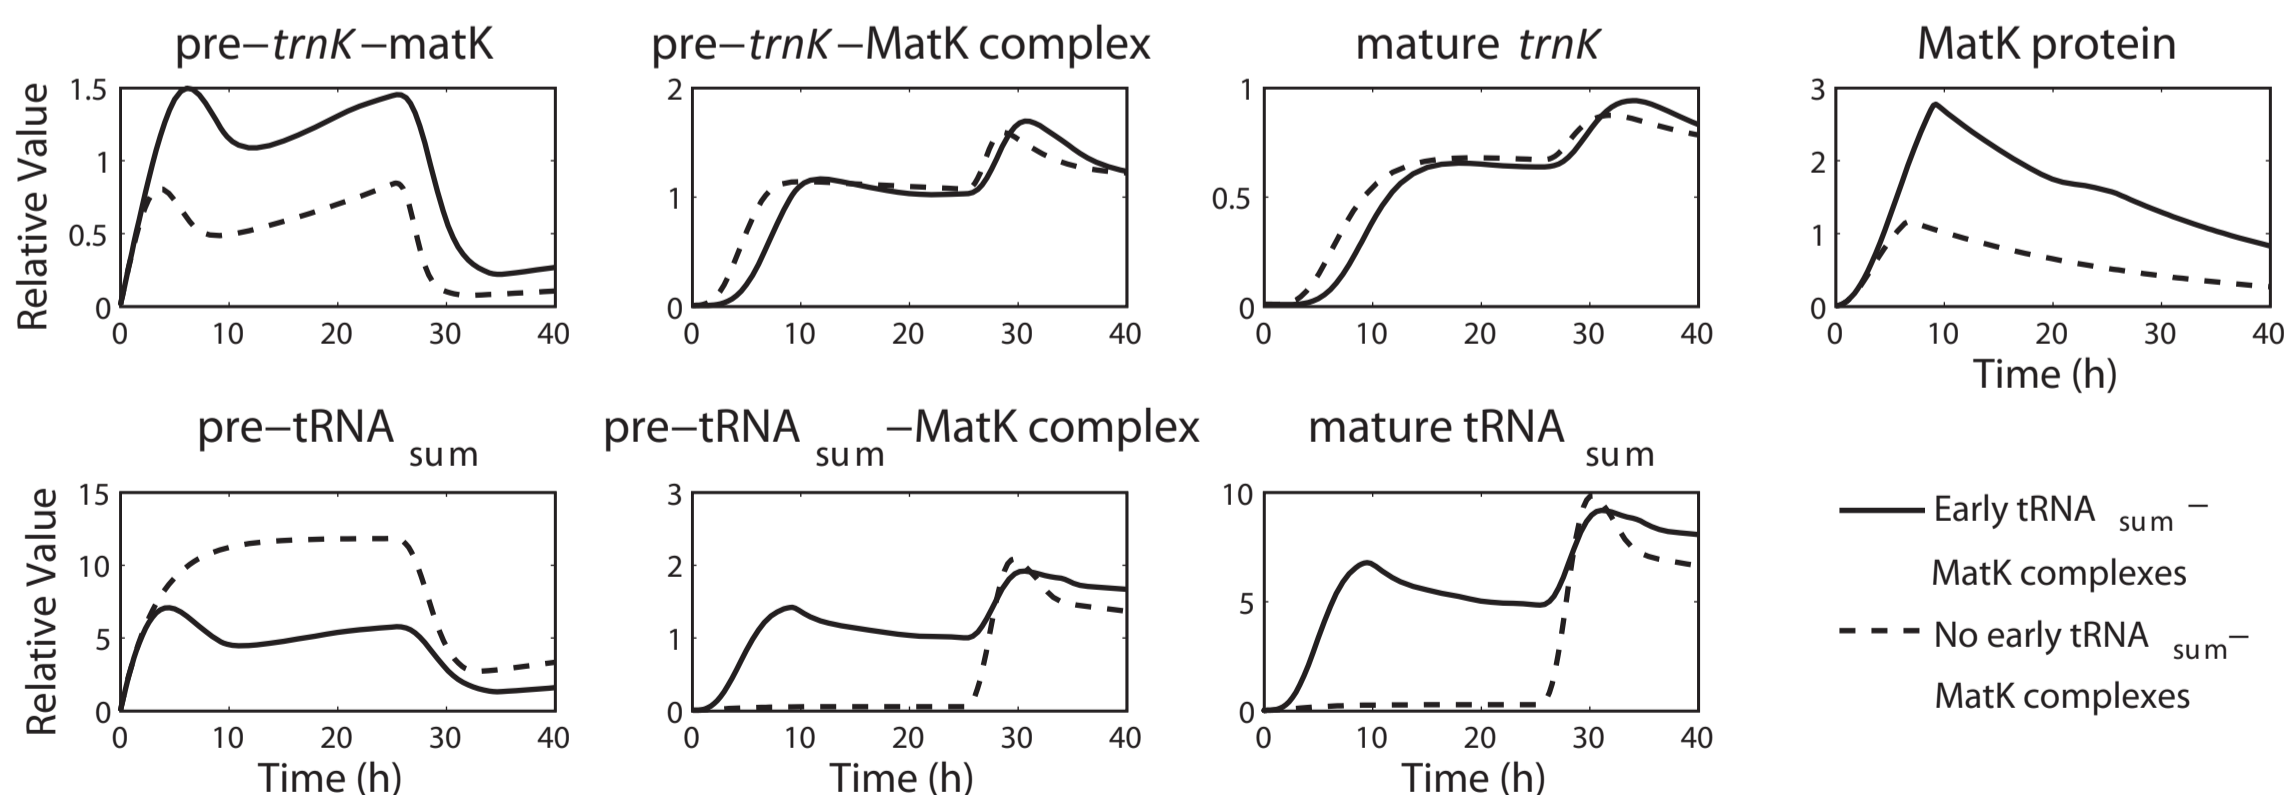**Supplemental Figure S2. Predictions of Model 1.**

A, Effects of a disrupted translational negative auto-feedback loop on the expression dynamics of the tRNA-MatK splicing network. Model 1 predicts a potentially harmful over-accumulation of MatK.

B, Effects of over-expression of MatK target genes on the overall accumulation dynamics within the tRNA-MatK gene expression network. The transcription rate of *pre-tRNA<sub>sum</sub>* (*trnA*, *trnV*, *trnI*) was increased 10-fold (10X *k<sub>s</sub>r* rate) or 20-fold (20X *k<sub>s</sub>r* rate). As a result, tRNAs matured timely delayed and MatK over-accumulates.

C, Accumulation dynamics of the model species in response to missing *pre-trnK/MatK* repression complexes at the early stage of development. Model 1 predicts an early saturation of spliced *tRNA<sub>sum</sub>* transcripts and an increased accumulation of the MatK protein.

D, Effects of missing *tRNA<sub>sum</sub>/MatK* complexes at the early stage of development on the expression dynamics of the model species. Model 1 predicts that *trnK-matK* precursors are processed more and earlier whereas excess quantities of *tRNA<sub>sum</sub>* precursors occur that are spliced after a time lag.
