# Supplementary material
Source: PubMed Central journal article supplement (PMC3850197)
Supplement: supp_pp.113.227579_227579suppl._table_1.pdf [file supp_pp.113.227579_227579suppl._table_1.pdf]

Supplemental Table 1: Oligonucleotides used in this study.

| Oligonucleotide    | Sequence (5'->3')               | Target                   | Purpose                                |
|--------------------|---------------------------------|--------------------------|----------------------------------------|
| 5'matk-HA-Test-fw  | caaaactctgttgacccccaaaatg       | <i>trnK</i> (UUU) intron | Northern, Dot-Blot, run-on (PCR probe) |
| 5'matk-HA-Test-rev | catttgataaccctcaaaatcttcgctc    | <i>trnK</i> (UUU) intron | Northern, Dot-Blot, run-on (PCR probe) |
| atpF_In_fw         | tccataatcccttcccgaacc           | <i>atpF</i> intron       | Northern, Dot-Blot, run-on (PCR probe) |
| atpF_In_rev        | gacgcagcatggtactctttctacc       | <i>atpF</i> intron       | Northern, Dot-Blot, run-on (PCR probe) |
| atpFex2fw          | cccaacatgccaatattggcactaatgg    | <i>atpF</i> exon 2       | Northern (PCR probe)                   |
| atpFex2rev         | cagaagaactgcgtggaggggc          | <i>atpF</i> exon 2       | Northern (PCR probe)                   |
| clpP_In_1_fw       | gcgcttttgatgcatacgg             | <i>clpP</i> intron 1     | run-on (PCR probe)                     |
| clpP_In_1_rev      | cgggcggatctttaccg               | <i>clpP</i> intron 1     | run-on (PCR probe)                     |
| clpPIn2_fw         | cggctctacaagaaaattgacctcc       | <i>clpP</i> intron 2     | run-on (PCR probe)                     |
| clpPIn2_rev        | ctgtatcgagagagtagtatgagataagggg | <i>clpP</i> intron 2     | run-on (PCR probe)                     |
| ndhA_In_fw         | ctcctttctcagaaaaagggcc          | <i>ndhA</i> intron       | run-on (PCR probe)                     |
| ndhA_In_rev        | ttgtcatgatagcttgaagcgg          | <i>ndhA</i> intron       | run-on (PCR probe)                     |
| ndhB_In_fw         | ctcgcgtatgtataagaccgaatcc       | <i>ndhB</i> intron       | run-on (PCR probe)                     |
| ndhB_In_rev        | cctacaaaggatcggactaatgacg       | <i>ndhB</i> intron       | run-on (PCR probe)                     |
| petB_In_fw         | cagacctcgtgtccgggc              | <i>petB</i> intron       | run-on (PCR probe)                     |
| petB_In_rev        | atatcaagttggcgcagtcgtc          | <i>petB</i> intron       | run-on (PCR probe)                     |
| petD_In_fw         | gtgtctttgtccaatcgccg            | <i>petD</i> intron       | run-on (PCR probe)                     |
| petD_In_rev        | gggtcgtctcagaccttctaattgg       | <i>petD</i> intron       | run-on (PCR probe)                     |
| psbA_fw            | gaaagcgaaagcctatgggg            | <i>psbA</i>              | run-on (PCR probe)                     |
| psbA_rev           | ctaagctcccactcacgacc            | <i>psbA</i>              | run-on (PCR probe)                     |
| psbD_fw            | gcccttgtaagtttaccaaagacg        | <i>psbD</i>              | run-on (PCR probe)                     |
| psbD_rev           | ggagagcaacaaaagtccacagacc       | <i>psbD</i>              | run-on (PCR probe)                     |
| psbE_fw            | ggaagcacaggagaacgttcg           | <i>psbE</i>              | run-on (PCR probe)                     |
| psbE_rev           | ccaaaggatcaaaacggcc             | <i>psbE</i>              | run-on (PCR probe)                     |
| rbcl_fw            | ggacaactgtatggaccgatgg          | <i>rbcl</i>              | run-on (PCR probe)                     |

|                  |                                        |                               |                                        |
|------------------|----------------------------------------|-------------------------------|----------------------------------------|
| rbcl_rev         | ccgcgaagacattcataaacagc                | <i>rbcl</i>                   | run-on (PCR probe)                     |
| rpl16_In_fw      | ccatctctactacagaaccggagc               | <i>rpl16</i> intron           | run-on (PCR probe)                     |
| rpl16_In_rev     | gatctgagaagtcacgagttaacct              | <i>rpl16</i> intron           | run-on (PCR probe)                     |
| rpl2_In_fw       | ccccttccaaactgtacaagc                  | <i>rpl2</i> intron            | Northern, Dot-Blot, run-on (PCR probe) |
| rpl2_In_rev      | caccgacagaaccggaagc                    | <i>rpl2</i> intron            | Northern, Dot-Blot, run-on (PCR probe) |
| rpl2ex2fw        | caagtgcaggataaccccaagggg               | <i>rpl2</i> exon 2            | Northern (PCR probe)                   |
| rpl2ex2rev       | gacaattagctagagcagcgggtgc              | <i>rpl2</i> exon2             | Northern (PCR probe)                   |
| rpoC1_In_fw      | gggataggattctataggatctcccc             | <i>rpoC1</i> intron           | run-on (PCR probe)                     |
| rpoC1_In_rev     | taaccatcgaggatgaagtcggg                | <i>rpoC1</i> intron           | run-on (PCR probe)                     |
| rps12_In_1_fw    | ctaataaccaacgaatggcaagtgc              | <i>rps12</i> intron 1 (trans) | run-on (PCR probe)                     |
| rps12_In_1_rev   | tttcacgctcatgtcacgtcg                  | <i>rps12</i> intron 1 (trans) | run-on (PCR probe)                     |
| rps12_In2_fw     | ccaataacgaaagtttcgtaaggg               | <i>rps12</i> (intron 2)       | Northern, Dot-Blot, run-on (PCR probe) |
| rps12_In2_rev    | tatccgtttccctccctttcc                  | <i>rps12</i> (intron 2)       | Northern, Dot-Blot, run-on (PCR probe) |
| rps12ex2fw       | cgccctgttgacgatcctttactcc              | <i>rps12</i> exon2            | Northern (PCR probe)                   |
| rps12ex2rev      | ccccaaaaaaccaactctgccttacg             | <i>rps12</i> exon 2           | Northern (PCR probe)                   |
| rps16_In_fw      | cggcaatttcattattgagcg                  | <i>rps16</i> intron           | run-on (PCR probe)                     |
| rps16_In_rev     | gaaggacaggatccgttgg                    | <i>rps16</i> intron           | run-on (PCR probe)                     |
| rrn16_fw         | gggaagtgggtttccagtgg                   | <i>rrn16</i>                  | run-on (PCR probe)                     |
| rrn16_rev        | ttacgcccaatcattccgg                    | <i>rrn16</i>                  | run-on (PCR probe)                     |
| rrn23_fw         | ggatacctaggcaccagagagc                 | <i>rrn23</i>                  | run-on (PCR probe)                     |
| rrn23_rev        | cacgggattccacgtgcc                     | <i>rrn23</i>                  | run-on (PCR probe)                     |
| trnAex1          | ttgcaagagcggagctctaccaactgagctatatcccc | <i>trnA</i> (UGC) exon 1      | Northern (oligonucleotide probe)       |
| trnA-In_fw2      | gaggtaggatgggcagttgg                   | <i>trnA</i> (UGC) intron      | Northern, Dot-Blot, run-on (PCR probe) |
| trnA-In_rev2     | tgagagcggagcagctaatgc                  | <i>trnA</i> (UGC) intron      | Northern, Dot-Blot, run-on (PCR probe) |
| trnEYD_fw        | gactgacggggctcgaacc                    | <i>trnE</i> , -Y, -D          | run-on (PCR probe)                     |
| trnEYD_rev       | cagcggggattcgaattcc                    | <i>trnE</i> , -Y, -D          | run-on (PCR probe)                     |
| trnG_(UCC)_In_fw | cccttaaatagttaaaggtccttcg              | <i>trnG</i> (UCC) intron      | Northern, run-on (PCR probe)           |

|                   |                                      |                          |                                        |
|-------------------|--------------------------------------|--------------------------|----------------------------------------|
| trnG_(UCC)_In_rev | ggaaaagggtttgtttccacc                | <i>trnG</i> (UCC) intron | Northern, run-on (PCR probe)           |
| trnI_(GAU)_In_fw  | ctttcgattcactcgtgggatc               | <i>trnI</i> (GAU) intron | Northern, Dot-Blot, run-on (PCR probe) |
| trnI_(GAU)_In_rev | cccttcttctaccctggc                   | <i>trnI</i> (GAU) intron | Northern, Dot-Blot, run-on (PCR probe) |
| trnIex2           | tgggcatcctggacttgaaccagagacctgccc    | <i>trnI</i> (GAU) exon 2 | Northern (oligonucleotide probe)       |
| trnKex2           | tgggttggccgggattcgaaccgggaactagtctgg | <i>trnK</i> (UUU) exon 2 | Northern (oligonucleotide probe)       |
| trnL_(UAA)_In_fw  | ggcaatcctgagccaaatcc                 | <i>trnL</i> (UAA) intron | run-on (PCR probe)                     |
| trnL_(UAA)_In_rev | ccggtattgacatgtagaacggg              | <i>trnL</i> (UAA) intron | run-on (PCR probe)                     |
| trnV_(UAC)_In_fw  | gataaggaaatggctccatgtgc              | <i>trnV</i> (UAC) intron | Northern, Dot-Blot, run-on (PCR probe) |
| trnV_(UAC)_In_rev | gagggaaacctagcctgacaaaag             | <i>trnV</i> (UAC) intron | Northern, Dot-Blot, run-on (PCR probe) |
| trnVex2           | tagggctatacggactcgaaccgtagaccttctcg  | <i>trnV</i> (UAC) exon 2 | Northern (oligonucleotide probe)       |
| ycf3_In_1_fw      | tctccgttccagaaccgtac                 | <i>ycf3</i> intron 1     | run-on (PCR probe)                     |
| ycf3_In_1_rev     | ctcgttctcctttggataccc                | <i>ycf3</i> intron 1     | run-on (PCR probe)                     |
| ycf3_In_2_fw      | ctcatggatctatcccagttttagg            | <i>ycf3</i> intron 2     | run-on (PCR probe)                     |
| ycf3_In_2_rev     | gggccgatacaataaactgcg                | <i>ycf3</i> intron 2     | run-on (PCR probe)                     |
